# Supplementary material
Source: PubMed Central journal article supplement (PMC2675677)
Supplement: 2008.000273_1.pdf [file 2008.000273_1.pdf]

# Qualitative and quantitative polymerase chain reaction monitoring of minimal residual disease in relapsed chronic lymphocytic leukemia: early assessment can predict long-term outcome after reduced intensity allogeneic transplantation

Lucia Farina,<sup>1</sup> Cristiana Carniti,<sup>1</sup> Anna Dodero,<sup>1</sup> Antonio Vendramin,<sup>1</sup> Anna Raganato,<sup>1</sup> Francesco Spina,<sup>1</sup> Francesca Patriarca,<sup>2</sup> Franco Narni,<sup>3</sup> Fabio Benedetti,<sup>4</sup> Attilio Olivieri,<sup>5</sup> and Paolo Corradini<sup>1</sup>

<sup>1</sup>Hematology Dept., Istituto Nazionale per lo Studio e la Cura dei Tumori, University of Milan, Italy; <sup>2</sup>Hematology Dept., University of Udine; <sup>3</sup>Hematology Dept., University of Modena; <sup>4</sup>Hematology Dept., University of Verona, Italy, and <sup>5</sup>Hematology Dept., Azienda Ospedaliera San Carlo, Potenza, Italy

Citation: Farina L, Carniti C, Dodero A, Vendramin A, Raganato A, Spina F, Patriarca F, Narni F, Benedetti F, Olivieri A, and Corradini P. Qualitative and quantitative PCR monitoring of minimal residual disease in relapsed chronic lymphocytic leukemia: early assessment can predict long-term outcome after reduced intensity allogeneic transplantation. *Haematologica* 2009; doi:10.3324/haematol.2008.000273

MW 10<sup>0</sup> 10<sup>-1</sup> 10<sup>-2</sup> 10<sup>-3</sup> 10<sup>-4</sup> 10<sup>-5</sup> 10<sup>-6</sup> 10<sup>-7</sup> PL N

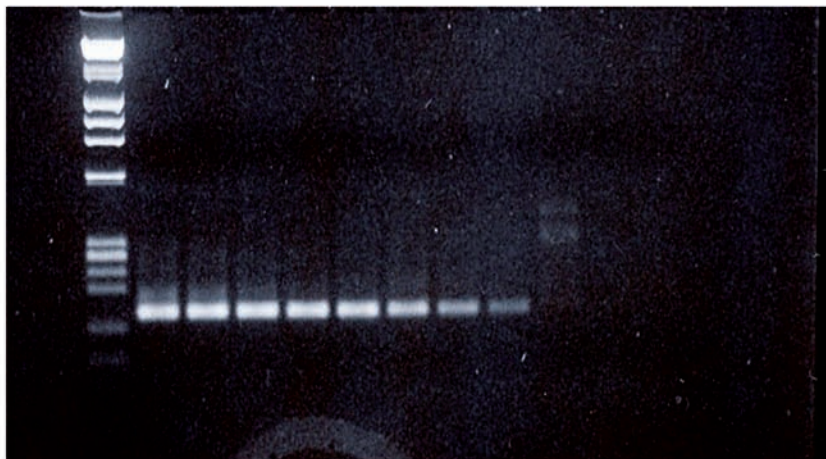

A

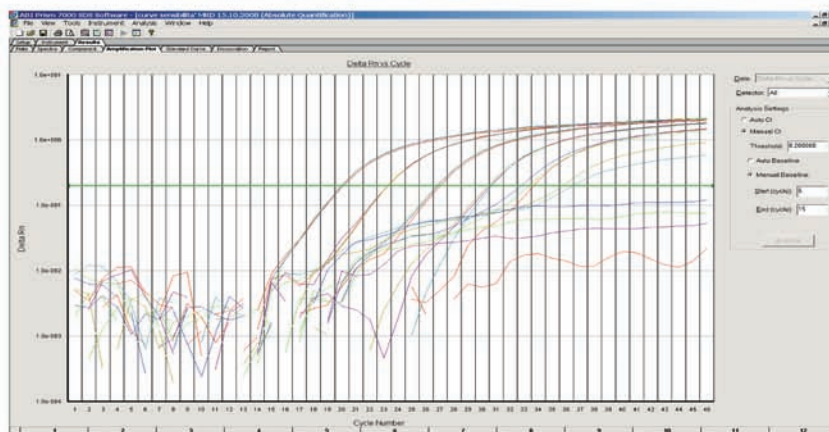

B

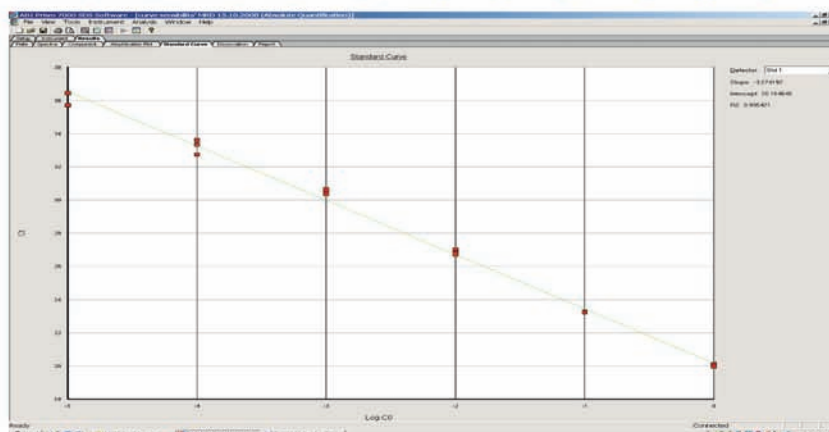

C

**Online Supplementary Figure S1.** (A) Serial dilutions of a CLL sample into a pool of normal blood samples from five healthy donors were carried out and 500 ng of DNA of each sample were used in nested-PCR. MW: molecular weight, PL: polyclonal sample of pooled DNA from five healthy donors, N: no template control (B) Real time PCR was carried out with 500 ng of DNA of serial diluted samples from 10<sup>0</sup> to 10<sup>-5</sup> run in triplicate. Polyclonal samples and no template control do not show any amplification. (C) The slope of the standard curve was -3.3 and the correlation coefficient 0.99.
